# Supplementary material
Source: HighWire-hosted journal article supplement (doi:10.1101/rna.080561.125)
Supplement: Supplemental_Information.docx [file Supplemental_Information.docx]

**SUPPLEMENTA INFORMATION**

**EDC4 C-terminal domain scaffolds P-body assembly and links P-body dynamics to p53-mediated tumor suppression**

Yu-Hsuan Cheng, Ting-Wen Chen, Wei-Chung Chiang, Jean-Cheng Kuo, Yi-Sheng Ho, Michelle Noble, and Chung-Te Chang

Institute of Biochemistry and Molecular Biology, National Yang Ming Chiao Tung University, 112 Taipei, Taiwan

**Supplemental Table 1. Constructs and mutants used in this study.**

| **Name** | **Fragments/mutations** | **Plasmid** |
| --- | --- | --- |
| GFP | - | pT7-EGFP-C1 |
| GFP-MBP | - | pT7-EGFP-C1-MBP |
| GFP-EDC4 | - | pT7-EGFP-C1-HsEDC4 |
| 1-538 | pT7-EGFP-C1-HsEDC4_1-538 |
| 538-973 | pT7-EGFP-C1-HsEDC4_538-973 |
| 974-1401 | pT7-EGFP-C1-HsEDC4_974-1401 |
| 1-1265 | pT7-EGFP-C1-HsEDC4_1-1265 |
| D974-1265 | pT7-EGFP-C1-HsEDC4_D974-1401 |
| 1-1265-TDP43 CTD | pT7-EGFP-C1-HsEDC4_1-1265-TDP43_266-414 |
| GFP-NBDY | - | pT7-EGFP-C1-NBDY |
| 22-41 | pT7-EGFP-C1-NBDY_22-41 |
| HA-EDC4 | - | pCIneo-lambdaN-HA-HsEDC4 |
| 1-538 | pCIneo-lambdaN-HA-HsEDC4_1-538 |
| 538-973 | pCIneo-lambdaN-HA-HsEDC4_539-973 |
| 974-1401 | pCIneo-lambdaN-HA-HsEDC4_974-1401 |
| GST-NBDY | 22-41 | pGEX-6P-1-Nobody_22-41 |
| MBP-EDC4 | C-ter | pETM-41P-HsEDC4_974-1401 |
| V5-SBP-MBP | - | pCIneo-v5-SBP-MBP |
| V5-SBP-MBP-NBDY | 22-41 | pCIneo-v5-SBP-MBP-NBDY_22-41 |
| HA-DCP1a | - | pCIneo-lambdaN-HA-DCP1a |
| HA-DCP2 | - | pCIneo-lambdaN-HA-DCP2 |
| GFP-POP2* | D40A/E42A | pT7-EGFP-C1-HsPOP2-D40A/E42A |
| MS2-HA | - | pcDNA3.1-MS2-HA |
| MS2-HA-SMG7 | - | pcDNA3.1-MS2-HA-HsSMG7 |

**Supplemental Table 2. Antibodies used in this study.**

| **Designation** | **Source or reference** | **Identifiers** | **Additional information** |
| --- | --- | --- | --- |
| anti-DDX6 (Rabbit monoclonal) | Bethyl Laboratories, Inc. | A300-461A | IF (1:1000) |
| Goat anti-rabbit Alexa Fluor™ 594 (Rabbit polyclonal) | Invitrogen | A-21207 | IF (1:1000) |
| anti-EDC4 (Mouse monoclonal) | Santa Cruz Biotechnology, Inc. | sc-8418 | WB (1:100), p70 S6 kinase α |
| anti-tubulin (Mouse monoclonal) | Sigma-Aldrich | T6199 | WB (1:5000) |
| anti-GFP (Mouse monoclonal) | Roche | 11814460001 | WB (1:2000) |
| anti-GFP (Rabbit polyclonal) | In house |  | IP |
| anti-HA-HRP (Mouse monoclonal) | Roche | 12013819001 | WB (1:10000) |
| anti-V5 (Mouse monoclonal) | Bio-Rad | MCA1360GA | WB (1:5000) |
| Anti-Digoxigenin-AP | Roche | 11093274910 | NB (1:10000) |

**Supplemental Figure legends**

**Supplemental Figure 1. Characterization of HEK293T EDC4** knockout **cells.**

EDC4 protein levels in HEK293T wild-type (WT) and EDC4 knockout (EDC4-KO) cells were examined by immunoblotting using antibodies against EDC4 and tubulin, the latter serving as a loading control.

**Supplemental Figure 2. EDC4 C-terminal domain promotes dynamic condensate formation in HEK293T cells**

Condensates formed by GFP-tagged EDC4 full-length (FL) (A) or C-terminal domain (a.a. 974-1401) (B) were photobleached using a 491 nm laser, and fluorescence recovery behavior was recorded for at least 10 condensates per sample. Scale bar=0.5 μm. Vertical bars represent the mean ± standard error of the mean (SEM).

**Supplemental Figure 3. EDC4ΔdC-TDP43-induced condensates colocalize with multiple P-body markers in EDC4-KO cells.**

GFP-tagged EDC4DdC-TDP43 (green) was overexpressed in EDC4 knockout (EDC4-KO) cells. P-bodies were detected by P-body markers DCP1a, DCP1b, EDC3, and PatL1 (red) and then counterstained with DAPI to visualize the nucleus (blue). In the merged image, the colocalization of GFP and P-body markers localization appears yellow. Scale bar=10 μm.

**Supplemental Figure 4. NBDY interacts with both the WD40 and C-terminal domains of EDC4**

GFP-NBDY was co-expressed with HA-tagged EDC4 (full-length or the indicated fragments) in HEK293T cells. Protein complexes were immunoprecipitated using anti-GFP antibodies conjugated to protein G beads. GFP-tagged MBP was used as a negative control. Input lysates (IN; 1%) and immunoprecipitated fractions (IP; 20%) were analyzed by SDS-PAGE and Western blotting. The asterisk indicates non-specific binding of the secondary antibody used for GFP detection.

**Supplemental Figure 5. NBDY 22-41 interacts with both the distal and proximal parts of the EDC4 C-terminal domain.**

The interaction between V5-SBP-MBP-NBDY 22-41 and GFP-EDC4 Δ973–1265 (A) or GFP-EDC4 1–1265 (B) was assessed by streptavidin-based pulldown using streptavidin beads. V5-SBP-tagged MBP was included as a negative control. Input lysates (1%) and bound fractions (20%) were analyzed by SDS-PAGE followed by Western blotting.

**Supplemental Figure 6. The full-length NBDY and its 22-41 fragment inhibit P-body assembly without disrupting the interaction networks among core P-body components.**

The core P-body components DCP1a and DCP2 maintain interactions with GFP-tagged EDC4 in the presence of NBDY full-length (FL) (A, B) or 22-41 (C, D). V5-SBP-MBP serves as a negative control. Protein molecular weights (kDa) are indicated on the right. The proteins were immunoprecipitated using streptavidin beads. The interactions were subsequently analyzed by SDS-PAGE followed by Western blotting. Input lysate (1%) and bound fractions (20%) were loaded.

**Supplemental Figure 7. NBDY 22–41 does not interfere with mRNA decay triggered by TNRC6A silencing domain or Nanos1.**

(A, C) HEK293T wild-type cells were transfected with the indicated reporter plasmids. 18S ribosomal RNA served as an internal control. (B, D) The β-globin-6xMS2bs mRNA levels were normalized to those of the control mRNA. These normalized values were set to 100 in cells expressing MS2-tagged HA. The values for relative mRNA levels in cells expressing MS2-tagged TNRC6A silencing domain **(**SD) or Nanos1 were then estimated. (E) A western blot demonstrating equivalent expression of the GFP-tagged proteins in panels (A, C). Tubulin served as a loading control.

**Supplemental Figure 8. NBDY expression and functional impact on cancer and cell proliferation.**

(A) Expression levels of NBDY in different cancer types from GEPIA2. The expression levels of cancer and normal tissue were from TCGA and GTEx. (B) The cell proliferation capacity of HEK293T cells was assessed using the CCK-8 assay at the indicated time points. Overexpression of GFP-NBDY or NBDY 22-41 resulted in a significant decrease in cell proliferation ability. Straight lines represent linear regression. Statistical significance was determined using two-way ANOVA, **P < 0.01; ***P < 0.001.

**Supplemental Figure 9. Pre-ranked GSEA pathway analysis comparing patient groups with high versus low NBDY expression across different cancer types.**

The pie chart illustrates the pre-ranked GSEA pathway analysis comparing patient groups with high versus low NBDY expression across 29 cancer types. The cancer types were categorized into three groups based on fold changes in NBDY expression: less than twofold (34%), between two- and fourfold (38%), and greater than fourfold (28%). Additionally, the proportion of cancers with significant p53 pathway activation is highlighted, comprising 24% of the total cancers analyzed. This visualization underscores the observed correlation between elevated NBDY expression and the activation of the p53 pathway in multiple cancer types, suggesting the potential role of NBDY and P-body dynamics in cancer progression and inhibition mechanisms.

**Supplemental Figure 10. NBDY 22–41 overexpression enhances mRNA stability of p53 pathway genes via post-transcriptional regulation**

mRNA decay analysis of HEK293T wild-type cells transfected with or without GFP‐tagged NBDY 22-41. RNA was isolated from cells after 4 (GADD45a) or 8 h (p53, ATF3, p21) of Actinomycin D treatment (10 mg/mL) to halt transcription. mRNA levels were measured by RT–qPCR, and mRNA levels were normalized to GAPDH levels. Normalized mRNA levels at 0 h of Actinomycin D treatment were set to 100% (control). Error bars represent the SD of three biological replicates, and statistical significance was established using two-way ANOVA. **P < 0.01; ***P < 0.001.
